# Supplementary material for: Mouse repeated electroconvulsive seizure (ECS) does not reverse social stress effects but does induce behavioral and hippocampal changes relevant to electroconvulsive therapy (ECT) side-effects in the treatment of depression
Source: PubMed Central journal article supplement (PMC5598988; doi:10.1371/journal.pone.0184603), 2017-09-14
Supplement: pone.0184603.s001.pdf [file pone.0184603.s001.pdf]

**S1: Body weight****Body weight block 1-4 (g)**

|                | Control (n=22) |      | CSS (n=22) |      |
|----------------|----------------|------|------------|------|
|                | Mean           | sem  | Mean       | sem  |
| <b>Block 1</b> | 29,19          | 0,26 | 29,31      | 0,48 |
| <b>Block 2</b> | 29,83          | 0,29 | 29,57      | 0,38 |
| <b>Block 3</b> | 30,44          | 0,31 | 30,02      | 0,45 |
| <b>Block 4</b> | 30,69          | 0,28 | 30,13      | 0,42 |

**Δ body weight block 1-4**

|                | Control (n=22) |      | CSS (n=22) |      |
|----------------|----------------|------|------------|------|
|                | Mean           | sem  | Mean       | sem  |
| <b>Block 1</b> | 1,19           | 0,10 | 0,93       | 0,08 |
| <b>Block 2</b> | 1,00           | 0,12 | 1,73       | 0,13 |
| <b>Block 3</b> | 1,04           | 0,11 | 1,25       | 0,10 |
| <b>Block 4</b> | 1,10           | 0,12 | 1,54       | 0,16 |

**Body weight block 4-6 (g)**

|                | Control Sham |      | Control ECS |      | CSS sham |      | CSS ECS |      |
|----------------|--------------|------|-------------|------|----------|------|---------|------|
|                | Mean         | sem  | Mean        | sem  | Mean     | sem  | Mean    | sem  |
| <b>Block 4</b> | 30,82        | 0,38 | 30,58       | 0,41 | 30,00    | 0,52 | 30,28   | 0,69 |
| <b>Block 5</b> | 30,73        | 0,36 | 29,93       | 0,32 | 30,16    | 0,56 | 29,98   | 0,75 |
| <b>Block 6</b> | 30,55        | 0,41 | 28,97       | 0,39 | 30,30    | 0,50 | 29,64   | 0,81 |
