# Supplementary material for: Mouse repeated electroconvulsive seizure (ECS) does not reverse social stress effects but does induce behavioral and hippocampal changes relevant to electroconvulsive therapy (ECT) side-effects in the treatment of depression
Source: PubMed Central journal article supplement (PMC5598988; doi:10.1371/journal.pone.0184603), 2017-09-14
Supplement: pone.0184603.s002.pdf [file pone.0184603.s002.pdf]

## S2: Fear conditioning and expression

### Fear conditioning: freezing during ITI (% of time)

| ITI | Control Sham (n=12) |      | Control ECS (n=12) |      | CSS sham (n=11) |      | CSS ECS (n=11) |      |
|-----|---------------------|------|--------------------|------|-----------------|------|----------------|------|
|     | Mean                | sem  | Mean               | sem  | Mean            | sem  | Mean           | sem  |
| 1   | 11,37               | 4,76 | 1,43               | 0,56 | 21,63           | 5,90 | 0,90           | 0,40 |
| 2-3 | 27,33               | 4,65 | 6,90               | 2,12 | 30,46           | 5,96 | 11,13          | 4,79 |
| 4-5 | 22,08               | 3,88 | 13,81              | 3,98 | 24,49           | 4,67 | 18,22          | 6,97 |

### Fear conditioning: freezing during CS (% of time)

| CS  | Control Sham (n=12) |      | Control ECS (n=12) |      | CSS sham (n=11) |      | CSS ECS (n=11) |      |
|-----|---------------------|------|--------------------|------|-----------------|------|----------------|------|
|     | Mean                | sem  | Mean               | sem  | Mean            | sem  | Mean           | sem  |
| 1-2 | 19,73               | 6,29 | 16,13              | 3,74 | 27,29           | 8,34 | 15,99          | 4,96 |
| 3-4 | 29,16               | 6,55 | 12,03              | 4,47 | 40,78           | 7,47 | 15,51          | 8,12 |
| 5-6 | 32,51               | 6,44 | 21,38              | 4,98 | 37,30           | 5,63 | 20,63          | 8,12 |

### Fear expression: freezing during ITI (% of time)

| ITI | Control Sham (n=12) |      | Control ECS (n=12) |      | CSS sham (n=11) |      | CSS ECS (n=11) |      |
|-----|---------------------|------|--------------------|------|-----------------|------|----------------|------|
|     | Mean                | sem  | Mean               | sem  | Mean            | sem  | Mean           | sem  |
| 1   | 22,50               | 5,03 | 8,28               | 2,69 | 25,23           | 5,71 | 5,45           | 2,12 |
| 2-3 | 22,15               | 5,31 | 12,84              | 3,50 | 22,65           | 5,60 | 4,91           | 3,48 |
| 4-5 | 21,88               | 3,60 | 7,73               | 1,97 | 22,05           | 7,08 | 4,25           | 1,25 |

### Fear expression: freezing during CS (% of time)

| CS  | Control Sham (n=12) |      | Control ECS (n=12) |      | CSS sham (n=11) |      | CSS ECS (n=11) |      |
|-----|---------------------|------|--------------------|------|-----------------|------|----------------|------|
|     | Mean                | sem  | Mean               | sem  | Mean            | sem  | Mean           | sem  |
| 1-2 | 35,58               | 7,80 | 10,56              | 3,27 | 32,30           | 6,45 | 10,10          | 4,43 |
| 3-4 | 34,60               | 7,21 | 8,79               | 2,76 | 33,62           | 7,30 | 5,45           | 4,14 |
| 5-6 | 26,84               | 4,97 | 10,74              | 2,35 | 29,36           | 8,64 | 6,65           | 2,94 |
