# Supplementary material for: Mouse repeated electroconvulsive seizure (ECS) does not reverse social stress effects but does induce behavioral and hippocampal changes relevant to electroconvulsive therapy (ECT) side-effects in the treatment of depression
Source: PubMed Central journal article supplement (PMC5598988; doi:10.1371/journal.pone.0184603), 2017-09-14
Supplement: pone.0184603.s003.pdf [file pone.0184603.s003.pdf]

### S3: Treadmill fatigue test

#### Habituation phase: cumulative duration of shocks (s)

|         | Sham  |      | ECS   |      |
|---------|-------|------|-------|------|
|         | Mean  | Sem  | Mean  | Sem  |
| Control | 10,38 | 0,92 | 12,72 | 1,57 |
| CSS     | 10,81 | 1,62 | 13,25 | 2,05 |

#### Test phase: cumulative duration of shocks (s)

|         | Sham |      | ECS  |      |
|---------|------|------|------|------|
|         | Mean | sem  | Mean | sem  |
| Control | 2,35 | 0,40 | 5,53 | 0,98 |
| CSS     | 5,67 | 1,22 | 6,76 | 1,20 |

#### Group size

Control x sham: n=12

Control x ECS: n=12

CSS x Sham: n=11

CSS x ECS: n=11
