# Supplementary material for: Mouse repeated electroconvulsive seizure (ECS) does not reverse social stress effects but does induce behavioral and hippocampal changes relevant to electroconvulsive therapy (ECT) side-effects in the treatment of depression
Source: PubMed Central journal article supplement (PMC5598988; doi:10.1371/journal.pone.0184603), 2017-09-14
Supplement: pone.0184603.s004.pdf [file pone.0184603.s004.pdf]

#### S4: hot plate test

##### Latency to first display pain-related behavior (s)

|                | Sham     |          | ECS      |          |
|----------------|----------|----------|----------|----------|
|                | Mean     | Sem      | Mean     | Sem      |
| <b>Control</b> | 30,83333 | 3,218868 | 25,83333 | 2,151227 |
| <b>CSS</b>     | 36,16667 | 5,381553 | 28,83333 | 5,101743 |

##### Group size

Control x sham: n=6

Control x ECS: n=6

CSS x Sham: n=6

CSS x ECS: n=6
